# Supplementary material for: Circulating tumor DNA shows variable clonal response of breast cancer during neoadjuvant chemotherapy
Source: PubMed Central journal article supplement (PMC5689695; doi:10.18632/oncotarget.21198), 2017-09-23
Supplement: oncotarget-08-86423-s001.pdf [file oncotarget-08-86423-s001.pdf]

# Circulating tumor DNA shows variable clonal response of breast cancer during neoadjuvant chemotherapy

## SUPPLEMENTARY MATERIALS

**A**

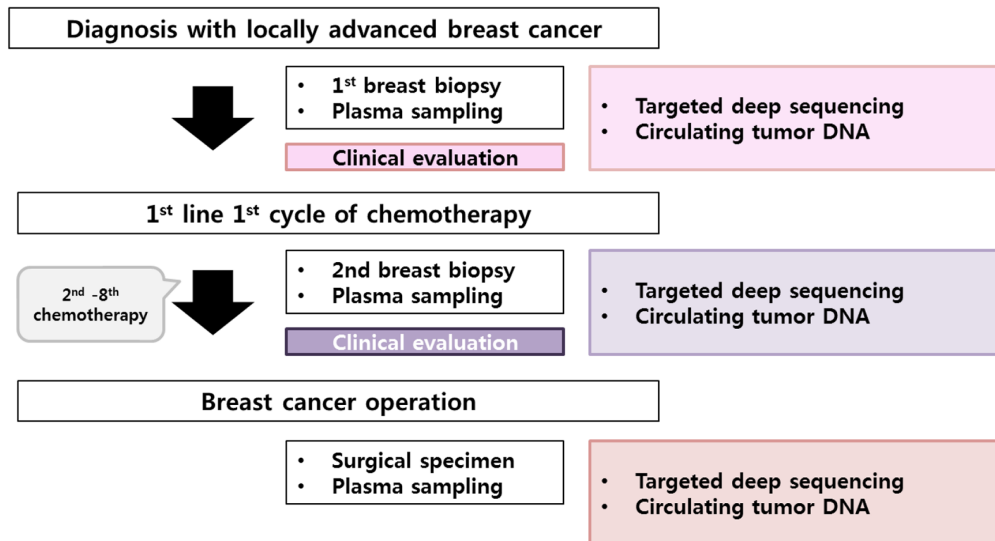

**B**

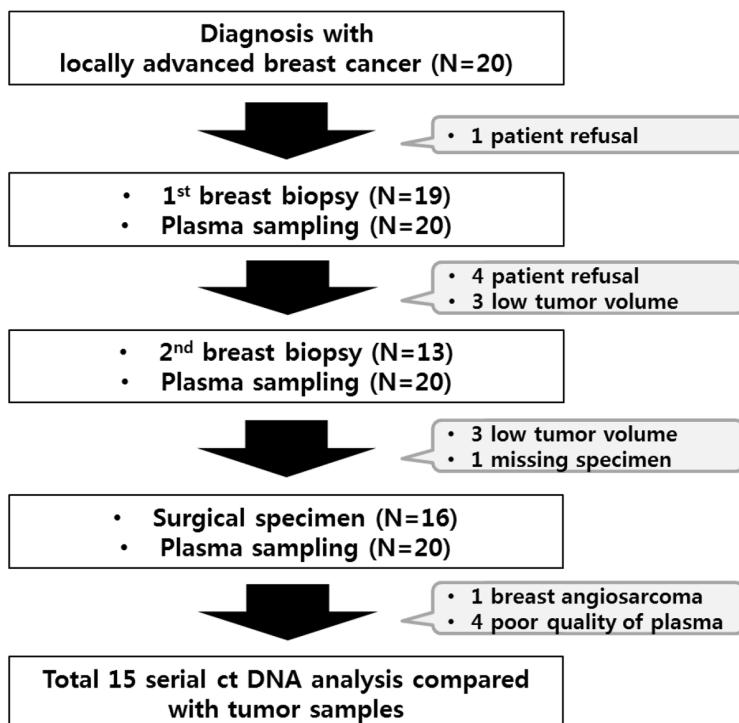

Supplementary Figure 1: (A) Concept of the experiment (B) Flowchart for experiment.

**Supplementary Table 1: 82 cancer gene list**

|        |       |        |       |       |       |      |        |        |         |
|--------|-------|--------|-------|-------|-------|------|--------|--------|---------|
| ABL1   | ARID2 | BRCA2  | EGFR  | FGFR1 | HRAS  | KDR  | NF1    | PIK3R1 | SMAD4   |
| AKT1   | ATM   | CDH1   | EPHB4 | FGFR2 | IDH1  | KIT  | NOTCH1 | PTCH1  | SMARCB1 |
| AKT2   | ATRX  | CDK4   | ERBB2 | FGFR3 | IDH2  | KRAS | NPM1   | PTCH2  | SMO     |
| AKT3   | AURKA | CDK6   | ERBB3 | FLT3  | IGF1R | MDM2 | NRAS   | PTEN   | SRC     |
| ALK    | AURKB | CDKN2A | ERBB4 | GNA11 | ITK   | MET  | NTRK1  | PTPN11 | STK11   |
| APC    | BCL2  | CSF1R  | EWSR1 | GNAQ  | JAK1  | MLH1 | PDGFRA | RB1    | SYK     |
| ARID1A | BRAF  | CTNNB1 | EZH2  | GNAS  | JAK2  | MPL  | PDGFRB | RET    | TMPRSS2 |
| ARID1B | BRCA1 | DDR2   | FBXW7 | HNF1A | JAK3  | MTOR | PIK3CA | ROS1   | TOP1    |
|        |       |        |       |       |       |      |        | TP53   | VHL     |

**Supplementary Table 2: Summary of sequencing metrics**

|         |      | Total read | No. of reads mapped | Duplication rate | On target base | On target rate | Median depth |
|---------|------|------------|---------------------|------------------|----------------|----------------|--------------|
| Plasma  | Mean | 35773700   | 1283872820          | 63.7             | 470489437      | 44.1           | 2289         |
|         | SD   | 16848265   | 657976988           | 10.4             | 273929362      | 10.0           | 1326         |
| WBC     | Mean | 38940588   | 2764860335          | 29.5             | 996635915      | 48.2           | 2404         |
|         | SD   | 7898747    | 863840070.5         | 15.6             | 416306950      | 8.8            | 1711         |
| Primary | Mean | 36946511   | 2871059317          | 19.6             | 1079375820     | 42.6           | 1187         |
|         | SD   | 11059113   | 1168009865          | 13.3             | 443535313      | 14.6           | 659          |

**Supplementary Table 3: Summary of circulating cell-free DNA preparation.**

See Supplementary File 1
